# Supplementary material for: Neural Networks for Survival Prediction in Medicine Using Prognostic Factors: A Review and Critical Appraisal
Source: Comput Math Methods Med. 2022 Sep 30;2022:1176060. doi: 10.1155/2022/1176060 (PMC9553343; doi:10.1155/2022/1176060)
Supplement: Supplementary Materials — They are provided in the online version of this manuscript. [file 1176060.f1.zip]

Archive with 3 entries (3 files):
- 1176060.f1.docx
- SNNs review - long.xlsx
- SNNs review - short.xlsx
