# Supplementary material for: Neural Networks for Survival Prediction in Medicine Using Prognostic Factors: A Review and Critical Appraisal
Source: Comput Math Methods Med. 2022 Sep 30;2022:1176060. doi: 10.1155/2022/1176060 (PMC9553343; doi:10.1155/2022/1176060)
Supplement: Supplementary Materials — They are provided in the online version of this manuscript. [file 1176060.f1.zip › SNNs review - long.xlsx]

## Sheet: Sheet1
Line number	Title	DOI	Manuscript type	Author	Journal	Publication year	Medical domain	# patients	# predictors	# outcomes	events %	How were missing values (if any) addressed in prognostic factors?	How were the prognostic variables scaled for NN?	Hyperparameters	Performance criterion (model development)?	Performance criterion (model validation)?	Method for confidence intervals for NN?	Validation	Calibration plot?	Programming language used for NN	Claim for NN performance compared to Cox model?	Interactions in Cox regression?
1	A practical application of neural network analysis for predicting outcome of individual breast cancer patients.	10.1007/bf01840841	Methodological	Ravdin et al.	Breast Cancer Research and Treatment	1992	Breast cancer	1373	7	Relapse-free survival	44.6	Unclear	Normalization	Unclear	Global Chi-squared statistic of Cox regression	Global Chi-squared statistic of Cox regression	No CI	Single random split	Yes	NeuralWare	Same	Unclear
2	Survival analysis of censored data: neural network analysis detection of complex interactions between variables.	10.1007/bf00666212	Methodological	De Laurentijs et al.	Breast Cancer Research and Treatment	1994	Breast cancer	2000	6	Relapse-free survival	Unclear	No missing values	No scaling needed	Unclear	Unclear	Global Chi-squared statistic of Cox regression, AUC	No CI	Single random split	No	NeuralWare	Better	Yes
3a	Survival analysis and neural nets.	10.1002/sim.4780131202	Methodological	Liestol et al.	Statistics in Medicine	1994	Malignant melanoma	201	5	Overall survival	26.4	Unclear	Unclear	Tuned - unclear procedure	log-likelihood	log-likelihood	No CI	Resampling - cv	No	PlaNet
3b	Survival analysis and neural nets.	10.1002/sim.4780131202	Methodological	Liestol et al.	Statistics in Medicine	1994	Post-partum amenorhoea	3470	4	Menstruation-free survival after birth	Unclear	Unclear	Unclear	Tuned - unclear procedure	log-likelihood	log-likelihood	No CI	Resampling - cv	No	PlaNet
4	Use of neural networks in predicting the risk of coronary artery disease.	10.1006/cbmr.1995.1004	Methodological	Lapuerta et al.	Computers and Biomedical Research	1995	Coronary artery disease	162	7	Time to clinical artery events	56.5	Unclear	Unclear	Unclear	McNemar's test	McNemar's test, Accuracy	No CI	Resampling - cv	No	NeuralWare	Better	No
5a	Feed forward neural networks for the analysis of censored survival data: a partial logistic regression approach.	10.1002/(sici)1097-0258(19980530)17:10<1169::aid-sim796>3.0.co;2-d	Methodological	Biganzoli et al.	Statistics in Medicine	1998	Head and neck cancer	96	1	Recurrence-free survival	76	Unclear	Normalization	Default and tuned	NIC		No CI	No validation	No	S-plus
5b	Feed forward neural networks for the analysis of censored survival data: a partial logistic regression approach.	10.1002/(sici)1097-0258(19980530)17:10<1169::aid-sim796>3.0.co;2-d	Methodological	Biganzoli et al.	Statistics in Medicine	1998	Lung cancer	137	6	Overall survival	93.4	Unclear	Normalization	Default and tuned	NIC		No CI	No validation	No	S-plus
6a	A Neural Network Model for Prognostic Prediction.	Not available	Methodological	Street et al.	ICML '98: Proceedings of the Fifteenth International Conference on Machine Learning	1998	Breast cancer	227	32	Disease-free survival	26.9	Separate attribute	Unclear	Unclear	Relative entropy	Separation of cases into good and bad prognosis	No CI	Resampling - cv	Yes	Unclear	Same or better	Unclear
6b	A Neural Network Model for Prognostic Prediction.	Not available	Methodological	Street et al.	ICML '98: Proceedings of the Fifteenth International Conference on Machine Learning	1998	Breast cancer		5	Overall survival	Unclear	Separate attribute	Unclear	Unclear	Relative entropy	Separation of cases into good and bad prognosis	No CI	Single random split	Yes	Unclear	Same or better	Unclear
7	A Bayesian neural network approach for modelling censored data with an application to prognosis after surgery for breast cancer.	10.1016/s0933-3657(03)00033-2	Methodological	Lisboa et al.	Artificial Intelligence in Medicine	2003	Breast cancer	1616	18	Breast cancer specific mortality	Unclear	Separate attribute	No scaling needed	Tuned	log-likelihood	log-likelihood	No CI	Single random split	Yes	Matlab	Same or better	No
8	Non-linear survival analysis using neural networks.	10.1002/sim.1655	Methodological	Ripley RM et al.	Statistics in Medicine	2004	Breast cancer	1335	11	Relapse-free survival	Unclear	Multiple regression	Normalization	Tuned	log-likelihood	log-likelihood, Accuracy, Sensitivity, Specificity	No CI	Resampling - nested cv	No	S-plus	Not better	No
9	Deep learning approach for survival prediction for patients with synovial sarcoma.	10.1177/1010428318799264	Methodological	Han et al.	Tumor Biology	2018	Synovial sarcoma	242	9	Overall survival	19	k-nearest neighbor	Unclear	Tuned - unclear procedure	AUC	AUC	Data resampling 100 times	Single random split	No	Python	Better	No
10	Prediction of Overall Survival and Novel Classification of Patients with Gastric Cancer Using the Survival Recurrent Network.	10.1245/s10434-018-6343-7	Methodological	Sung Eun Oh et al.	Annals of Surgical Oncology	2018	Gastric cancer	1243	25	Overall survival	Unclear	k-nearest neighbor	Normalization	Tuned - unclear procedure	AUC	AUC	Unclear	Single random split	Yes	Python
11a	Survival outcome prediction in cervical cancer: Cox models vs deep-learning model.	10.1016/j.ajog.2018.12.030	Methodological	Matsuo et al.	Americal Journal of Obstetrics and Gynecology	2019	Cervical cancer	768	40	Progression-free survival	31.4	Unclear	Unclear	Tuned - unclear procedure	MAE, C-index	MAE, C-index	Data resampling 10 times	Multiple random split	No	Python	Better	No
11b	Survival outcome prediction in cervical cancer: Cox models vs deep-learning model.	10.1016/j.ajog.2018.12.030	Methodological	Matsuo et al.	Americal Journal of Obstetrics and Gynecology	2019	Cervical cancer	768	40	Overall survival	22.1	Unclear	Unclear	Tuned - unclear procedure	MAE, C-index	MAE, C-index	Data resampling 10 times	Multiple random split	No	Python	Better	No
12a	Comparison of the performance of neural network methods and Cox regression for censored survival data	10.1016/S0167-9473(99)00098-5	Application	Xiang et al.	Computational Statistics and Data Analysis	2000	General (simulation study)	200	2	Overall survival			No scaling needed	Default	C-index	C-index	Data resampling 50 times	Single random split	No	Epilog Plus	Not better	Yes
12b	Comparison of the performance of neural network methods and Cox regression for censored survival data	10.1016/S0167-9473(99)00098-5	Application	Xiang et al.	Computational Statistics and Data Analysis	2000	General (simulation study)	400	4	Overall survival			No scaling needed	Default	C-index	C-index	Data resampling 50 times	Single random split	No	Epilog Plus	Not better	Yes
13a	Comparison of Cox regression with other methods for determining prediction models and nomograms.	10.1097/01.ju.0000094764.56269.2d	Application	Kattan et al.	The Journal of Urology	2003	Prostate cancer	601	4	Recurrence-free survival	11	Unclear	Unclear	Default and tuned	Unclear	C-index	Data resampling 50 times	Single random split	No	S-plus	Not better	No
13b	Comparison of Cox regression with other methods for determining prediction models and nomograms.	10.1097/01.ju.0000094764.56269.2d	Application	Kattan et al.	The Journal of Urology	2003	Prostate cancer	1042	5	Recurrence-free survival	44.6	Unclear	Unclear	Default and tuned	Unclear	C-index	Data resampling 50 times	Single random split	No	S-plus	Not better	No
13c	Comparison of Cox regression with other methods for determining prediction models and nomograms.	10.1097/01.ju.0000094764.56269.2d	Application	Kattan et al.	The Journal of Urology	2003	Renal cell carcinoma	920	3	Recurrence-free survival	13.5	Unclear	Unclear	Default and tuned	Unclear	C-index	Data resampling 50 times	Resampling - nested cv	No	S-plus	Not better	No
14	An artificial neural network improves prediction of observed survival in patients with laryngeal squamous carcinoma.	10.1007/s00405-006-0021-2	Application	Jones et al.	European Archives of Otorhinolaryngology	2006	Laryngeal squamous carcinoma	873	7	Overall survival	97.9	Unclear	No scaling needed	Tuned - unclear procedure	Unclear	Survival curves comparison with log-rank test	Rerun neural network 10 times for each covariate	Single random split	Yes	Matlab	Same or better	No
15a	Application of artificial neural network-based survival analysis on two breast cancer datasets.	Not available	Application	Chi et al.	AMIA Annual Symposium Proceedings	2007	Breast cancer	198	30	Overall survival	23.7	Unclear	Unclear	Default	Unclear	Wilcoxon test (separation of cases into good and bad prognosis)	No CI	Resampling - cv	Yes	Unclear
15b	Application of artificial neural network-based survival analysis on two breast cancer datasets.	Not available	Application	Chi et al.	AMIA Annual Symposium Proceedings	2007	Breast cancer	462	30	Disease-free survival	33.1	Unclear	Unclear	Default	Unclear	Wilcoxon test (separation of cases into good and bad prognosis)	No CI	Resampling - cv	Yes	Unclear
16	Double-blind evaluation and benchmarking of survival models in a multi-centre study.	10.1016/j.compbiomed.2006.10.001	Application	Taktak et al.	Computers in Biology and Medicine	2007	Uveal melanoma	2880	6	Overall survival	27.6	Separate attribute for categorical, ignored for continuous	Normalization	Unclear	log-likelihood	Time-dependent C-index (Ctd)	A non-parametric CI based on Gaussian approximation was obtained by jack-knifing the empirical estimator Ctd	Single random split	Yes	Unclear	Same	No
17	Assessment of gastric cancer survival: using an artificial hierarchical neural network.	10.3923/pjbs.2008.1076.1084	Application	Amiri et al.	Pakistan Journal of Biological Sciences	2008	Gastric cancer	330	8	Overall survival	68.5	Unclear	No scaling needed	Default and tuned - unclear procedure	Unclear	Comparison of predicted probabilities with Kaplan Meier	No CI	Single random split	Yes	Unclear	Better	No
18a	Time-to-event analysis with artificial neural networks: an integrated analytical and rule-based study for breast cancer.	10.1016/j.neunet.2007.12.034	Application	Lisboa et al.	Neural Networks	2008	Breast cancer	2535	5	Breast cancer specific mortality	Unclear	Separate attribute for categorical, median imputation for continuous	Standardization	Tuned	log-likelihood	Prognostic risk group discrimination	No CI	External validation	No	Unclear	Better	No
18b	Time-to-event analysis with artificial neural networks: an integrated analytical and rule-based study for breast cancer.	10.1016/j.neunet.2007.12.034	Application	Lisboa et al.	Neural Networks	2008	Breast cancer	2535	5	Disease-free survival	Unclear	Separate attribute for categorical, median imputation for continuous	Standardization	Tuned	log-likelihood	Prognostic risk group discrimination	No CI	External validation	No	Unclear	Better	No
19	Nonlinear Survival Regression Using Artificial Neural Network.	10.1155/2013/753930	Application	Biglarian et al.	Journal of Probability and Statistics	2013	General (simulation study)	1000		Overall survival			No scaling needed	Default and tuned	BIC	MSE, C-index	Data resampling 100 times	Single random split	No	R	Same or better	No
20	Artificial neural networks--a method for prediction of survival following liver resection for colorectal cancer metastases.	10.1016/j.ejso.2013.02.024	Application	Spelt et al.	European Journal of Surgical Oncology	2013	Colorectal cancer	241	28	Overall survival	Unclear	Probability imputation 20 times	Unclear	Tuned - unclear procedure	C-index	C-index	No CI	Resampling - cv	Yes	Matlab
21	Big Data Toolsets to Pharmacometrics: Application of Machine Learning for Time-to-Event Analysis.	10.1111/cts.12541	Application	Gong et al.	Clinical and Translational Science	2018	Pharmacometrics (simulation study)	1000		Overall survival			No scaling needed	Unclear	Unclear	C-index	Repeat simulations 500 times	Single random split	No	Unclear	Same or better	No
22a	Development and verification of prediction models for preventing cardiovascular diseases	10.1371/journal.pone.0222809	Methodological	Sung Min J et al.	PLOS One	2019	Cardiovascular disease	361239	7	Death or hospitalization due to cardiovascular events	6.6	Multiple imputations by fully conditional specification	Unclear	Default and tuned - unclear procedure	Cross-entropy	AUC	Unclear	Single random split	Yes	Unclear	Better	No
22b	Development and verification of prediction models for preventing cardiovascular diseases	10.1371/journal.pone.0222809	Methodological	Sung Min J et al.	PLOS One	2019	Cardiovascular disease	4276	7	Death or hospitalization due to cardiovascular events	11.7	Multiple imputations by fully conditional specification	Unclear	Default and tuned - unclear procedure	Cross-entropy	AUC	Unclear	External validation	Yes	Unclear	Better	No
23	Survival prediction models since liver transplantation - comparisons between Cox models and machine learning techniques	10.1186/s12874-020-01153-1	Application	Kantidakis et al.	BMC Medical Research Methodology	2020	Liver transplantation	62294	97	Overall survival	30.9	missForest algorithm	Standardization	Tuned	IBS	IBS, Brier Score	No CI	Single random split	Yes	R	Better	No
24	DeepBTS: Prediction of Recurrencefree Survival of Non-small Cell Lung Cancer Using a Time-binned Deep Neural Network	10.1038/s41598-020-58722-z	Methodological	Lee et al.	Scientific Reports	2020	Lung cancer	1320	28	Recurrence-free survival	Unclear	Separate attribute for categorical, mean imputation for continuous	Unclear	Unclear	RMSE	C-index, AUC	Data resampling 10 times	External validation	No	Python	Better	No
